# Supplementary material
Source: MDPI journal article supplement (https://www.mdpi.com/2073-4441/15/24/4273)
Supplement: s1 [file s1]

**Table S1. Lake water physical, chemical and isotopic data.**

| Sample ID | Depth (cm) | pH   | EC (mS/cm) | Eh (mV) | DO (mg/L) | Temp. (°C) | TOC (mg/L) | DIC (umol/L) | δD (‰)  | δ <sup>18</sup> O (‰) |
|-----------|------------|------|------------|---------|-----------|------------|------------|--------------|---------|-----------------------|
| N72B      | 0          | 2.77 | 2.21       | 538     | 8.36      | 20.6       | 2.86       | 239.4        | -44.426 | -5.785                |
| N73B      | 25         | 2.74 | 2.16       | 541     | 8.35      | 20.6       | 1.80       | 236.0        | -43.623 | -5.474                |
| N74B      | 50         | 2.74 | 2.15       | 543     | 8.42      | 20.4       | 1.69       | 139.0        | -43.639 | -5.193                |
| N75B      | 75         | 2.74 | 2.16       | 541     | 8.42      | 20.2       | 2.30       | 268.1        | -44.570 | -5.232                |
| N76B      | 100        | 2.74 | 2.16       | 539     | 8.42      | 20.1       | 1.50       | 226.0        | -43.667 | -5.062                |
| N77B      | 125        | 2.74 | 2.15       | 541     | 8.42      | 20.4       | 1.35       | 240.4        | -42.868 | -5.111                |
| N78B      | 150        | 2.84 | 2.16       | 541     | 8.41      | 20.1       | 1.76       | 215.7        | -43.099 | -4.947                |
| N79B      | 175        | 2.83 | 2.15       | 540     | 8.42      | 20.3       | 2.10       | 134.7        | -43.993 | -5.156                |
| N80B      | 200        | 2.81 | 2.16       | 541     | 8.42      | 20.1       | 2.78       | 126.5        | -42.973 | -4.887                |
| N81B      | 225        | 2.81 | 2.15       | 541     | 8.37      | 20.3       | 2.37       | 149.9        | -44.627 | -5.444                |
| N82B      | 250        | 2.80 | 2.16       | 540     | 8.38      | 20.1       | 1.71       | 155.6        | -44.080 | -5.148                |
| N83B      | 275        | 2.80 | 2.15       | 541     | 8.43      | 20.3       | 1.82       | 142.1        | -43.571 | -5.102                |
| N84B      | 300        | 2.80 | 2.15       | 540     | 8.42      | 20.2       | 1.52       | 137.1        | -43.869 | -4.872                |
| N85B      | 325        | 2.79 | 2.15       | 540     | 8.41      | 20.3       | 1.66       | 135.9        | -42.345 | -4.800                |
| N86B      | 350        | 2.79 | 2.15       | 539     | 8.38      | 20.1       | 1.76       | 140.3        | -42.023 | -4.512                |
| N87B      | 375        | 2.79 | 2.15       | 535     | 8.31      | 20.3       | 1.39       | 159.0        | -42.636 | -4.431                |
| N88B      | 400        | 2.88 | 2.13       | 439     | 5.15      | 19.2       | 1.87       | 782.1        | -44.839 | -4.837                |
| N89B      | 425        | 2.95 | 2.18       | 410     | 5.04      | 18.7       | 3.52       | 2247.5       | -47.830 | -5.253                |
| N90B      | 450        | 5.04 | 2.53       | 200     | 1.68      | 15.2       | 4.38       | 4210.0       | -58.829 | -7.326                |
| N91B      | 475        | 5.35 | 2.58       | 173     | 1.43      | 14.3       | 3.58       | 4995.3       | -61.304 | -7.626                |
| N92B      | 500        | 5.50 | 2.68       | 202     | 1.57      | 13.7       | 3.63       | 4588.0       | -61.740 | -7.830                |
| N93B      | 525        | 5.57 | 2.71       | 177     | 1.15      | 13.1       | 4.55       | 5775.4       | -61.837 | -7.982                |
| N94B      | 550        | 5.66 | 2.9        | 215     | 1.03      | 12.2       | 5.59       | 5268.9       | -62.710 | -8.206                |
| N95B      | 575        | 5.75 | 2.94       | 187     | 0.95      | 11.8       | 3.98       | 6933.7       | -62.417 | -8.353                |
| S96B      | 0          | 2.91 | 2.16       | 539     | 8.34      | 20.2       | 2.58       | 168.6        | -42.064 | -5.065                |
| S97B      | 25         | 3.01 | 2.16       | 542     | 8.33      | 20.1       | 4.10       | 156.8        | -41.008 | -4.772                |
| S98B      | 50         | 3.03 | 2.14       | 539     | 8.38      | 20.1       | 3.33       | 130.6        | -41.430 | -4.718                |
| S99B      | 75         | 3.04 | 2.14       | 540     | 8.36      | 20         | 2.87       | 138.4        | -42.041 | -4.659                |
| S100B     | 100        | 3.15 | 2.14       | 541     | 8.36      | 20         | 3.51       | 130.6        | -41.603 | -4.745                |
| S101B     | 125        | 3.14 | 2.14       | 540     | 8.35      | 20         | 2.42       | 128.4        | -41.263 | -4.507                |
| S102B     | 150        | 3.09 | 2.14       | 540     | 8.37      | 20         | 3.28       | 131.2        | -41.702 | -4.461                |
| S103B     | 175        | 3.09 | 2.14       | 540     | 8.36      | 20.1       | 2.27       | 138.7        | -41.712 | -4.441                |
| S104B     | 200        | 3.08 | 2.14       | 539     | 8.36      | 20         | 3.31       | 138.4        | -42.000 | -4.352                |
| S105B     | 225        | 3.07 | 2.14       | 541     | 8.36      | 20         | 3.33       | 118.1        | -41.161 | -4.308                |
| S106B     | 250        | 3.06 | 2.15       | 540     | 8.38      | 20         | 1.66       | 129.7        | -41.157 | -4.361                |
| S107B     | 275        | 3.06 | 2.14       | 540     | 8.39      | 20         | 2.52       | 132.2        | -41.541 | -4.304                |
| S108B     | 300        | 3.04 | 2.15       | 539     | 8.39      | 20         | 4.10       | 143.4        | -40.889 | -4.309                |
| S109B     | 325        | 3.04 | 2.14       | 540     | 8.37      | 20         | 4.39       | 135.0        | -41.100 | -4.201                |
| S110B     | 350        | 3.01 | 2.13       | 533     | 7.97      | 19.7       | 1.19       | 179.6        | -41.716 | -4.555                |
| S111B     | 375        | 3.00 | 2.13       | 533     | 7.93      | 20         | 1.14       | 175.5        | -41.057 | -4.405                |
| S112B     | 400        | 3.06 | 2.06       | 462     | 2.31      | 17.8       | 7.07       | 1186.6       | -47.732 | -5.450                |
| S113B     | 425        | 3.06 | 2.06       | 453     | 2.12      | 16.1       | 6.01       | 1020.1       | -48.654 | -5.641                |
| S114B     | 450        | 2.98 | 2.05       | 439     | 1.67      | 16         | 7.75       | 1396.8       | -50.838 | -6.056                |
| S115B     | 475        | 2.91 | 2.06       | 440     | 1.51      | 15.3       | 6.19       | 1222.8       | -50.912 | -6.286                |
| S116B     | 500        | 2.73 | 2.06       | 430     | 1.22      | 15.2       | 6.62       | 1344.4       | -53.267 | -6.347                |
| S117B     | 525        | 2.71 | 2.05       | 422     | 1.11      | 15.2       | 6.43       | 1361.3       | -52.840 | -6.458                |

**Table S1. (continued... Lake water physical, chemical and isotopic data.)**

| Sample ID  | Depth (cm) | Ca     | Mg     | Na    | K     | Fe <sup>II</sup> | Fe <sup>III</sup> | Fe <sub>total</sub> | Al    | Mn    | Si    | SO <sub>4</sub> | Cl    | NO <sub>3</sub> |
|------------|------------|--------|--------|-------|-------|------------------|-------------------|---------------------|-------|-------|-------|-----------------|-------|-----------------|
| ( μmol/L ) |            |        |        |       |       |                  |                   |                     |       |       |       |                 |       |                 |
| N72B       | 0          | 4384.4 | 1321.9 | 395.7 | 199.6 | 121.0            | 1468.8            | 1589.7              | -     | -     | -     | 8034.9          | 759.7 | 33.3            |
| N73B       | 25         | 4370.5 | 1351.9 | 399.1 | 200.0 | 119.0            | 1462.9            | 1581.9              | -     | -     | -     | 8148.5          | 672.7 | 34.6            |
| N74B       | 50         | 4519.0 | 1343.4 | 400.9 | 187.6 | 86.7             | 1467.8            | 1554.5              | -     | -     | -     | 8091.7          | 635.2 | 33.3            |
| N75B       | 75         | 4493.5 | 1343.4 | 398.7 | 183.6 | 102.3            | 1476.6            | 1579.0              | -     | -     | -     | 8034.9          | 648.6 | 33.3            |
| N76B       | 100        | 4475.6 | 1336.4 | 394.3 | 178.4 | 93.5             | 1482.5            | 1576.2              | -     | -     | -     | 7978.1          | 704.9 | 30.7            |
| N77B       | 125        | 4573.6 | 1326.4 | 388.9 | 178.1 | 86.7             | 1489.3            | 1576.6              | -     | -     | -     | 7978.1          | 581.7 | 28.0            |
| N78B       | 150        | 4555.1 | 1326.4 | 390.8 | 183.4 | 94.5             | 1480.5            | 1575.1              | -     | -     | -     | 7921.3          | 715.6 | 50.5            |
| N79B       | 175        | 4563.7 | 1305.2 | 393.8 | 185.0 | 85.7             | 1490.3            | 1576.0              | -     | -     | -     | 7978.1          | 600.4 | 61.1            |
| N80B       | 200        | 4574.9 | 1322.2 | 393.8 | 182.6 | 96.5             | 1488.4            | 1584.8              | -     | -     | -     | 7921.3          | 564.7 | 26.7            |
| N81B       | 225        | 4562.5 | 1330.7 | 394.3 | 180.2 | 94.5             | 1482.5            | 1577.0              | -     | -     | -     | 8034.9          | 629.9 | 25.4            |
| N82B       | 250        | 4539.4 | 1330.7 | 399.6 | 186.3 | 97.5             | 1475.6            | 1573.1              | -     | -     | -     | 8091.7          | 637.9 | 26.7            |
| N83B       | 275        | 4547.6 | 1334.9 | 401.8 | 183.9 | 99.4             | 1475.6            | 1575.0              | -     | -     | -     | 7978.1          | 611.1 | 29.3            |
| N84B       | 300        | 4635.8 | 1343.4 | 407.2 | 189.7 | 97.5             | 1484.4            | 1581.9              | -     | -     | -     | 7978.1          | 629.9 | 30.7            |
| N85B       | 325        | 4683.1 | 1347.6 | 405.2 | 185.2 | 97.5             | 1479.6            | 1577.4              | -     | -     | -     | 8091.7          | 597.7 | 32.0            |
| N86B       | 350        | 4675.2 | 1347.6 | 406.7 | 188.9 | 106.3            | 1475.6            | 1581.9              | -     | -     | -     | 8034.9          | 654.0 | 34.6            |
| N87B       | 375        | 4672.9 | 1339.1 | 405.4 | 182.6 | 104.3            | 1464.9            | 1569.2              | -     | -     | -     | 7864.5          | 640.6 | 78.2            |
| N88B       | 400        | 4669.1 | 1508.7 | 410.3 | 163.8 | 3833.6           | 1509.9            | 5343.6              | -     | -     | -     | 8432.5          | 560.2 | 98.7            |
| N89B       | 425        | 4625.4 | 1517.1 | 398.3 | 171.5 | 8060.5           | 1702.4            | 9763.0              | -     | -     | -     | 9227.8          | 501.3 | 26.7            |
| N90B       | 450        | 4737.9 | 1563.8 | 397.4 | 177.0 | 7711.2           | 1791.9            | 9503.1              | -     | -     | -     | 15022.1         | 295.0 | 47.9            |
| N91B       | 475        | 4728.1 | 1525.6 | 401.2 | 174.7 | 8522.0           | 1756.7            | 10278.7             | -     | -     | -     | 15987.8         | 345.0 | 45.2            |
| N92B       | 500        | 4735.2 | 1568.0 | 400.1 | 175.5 | 9068.4           | 1592.2            | 10660.5             | -     | -     | -     | 16839.9         | 297.7 | 46.5            |
| N93B       | 525        | 4746.3 | 1559.5 | 400.9 | 170.6 | 9644.1           | 1363.0            | 11007.2             | -     | -     | -     | 16044.6         | 311.1 | 45.2            |
| N94B       | 550        | 4732.4 | 1569.5 | 411.9 | 170.3 | 10548.9          | 1192.7            | 11741.6             | -     | -     | -     | 18203.2         | 308.4 | 63.7            |
| N95B       | 575        | 4739.8 | 1580.3 | 411.0 | 169.7 | 11612.3          | 1045.8            | 12658.1             | 230.5 | 65.87 | 497.8 | 17237.5         | 268.2 | 149.2           |
| S96B       | 0          | 4291.6 | 1312.5 | 392.8 | 201.8 | 185.6            | 1468.8            | 1654.4              | 278.7 | 53.51 | 502.0 | 8318.9          | 627.2 | 21.4            |
| S97B       | 25         | 4286.7 | 1317.5 | 394.1 | 184.2 | 119.0            | 1476.6            | 1595.6              | 281.7 | 52.97 | 502.0 | 7750.9          | 686.1 | 26.7            |
| S98B       | 50         | 4416.4 | 1311.3 | 391.9 | 182.1 | 111.2            | 1488.4            | 1599.5              | 280.9 | 53.70 | 502.0 | 7978.1          | 664.7 | 29.3            |
| S99B       | 75         | 4441.3 | 1304.3 | 389.7 | 177.2 | 114.1            | 1484.4            | 1598.5              | 278.3 | 53.51 | 502.0 | 8034.9          | 619.2 | 24.0            |
| S100B      | 100        | 4452.1 | 1297.5 | 385.4 | 173.2 | 119.0            | 1481.5            | 1600.5              | 274.9 | 52.90 | 501.4 | 8034.9          | 691.9 | 22.7            |
| S101B      | 125        | 4466.3 | 1282.8 | 380.2 | 172.9 | 113.1            | 1493.3            | 1606.4              | 273.5 | 53.88 | 498.5 | 7580.4          | 643.3 | 26.7            |
| S102B      | 150        | 4456.3 | 1287.8 | 378.0 | 178.0 | 115.1            | 1481.5            | 1596.6              | 273.9 | 54.06 | 502.0 | 8148.5          | 654.0 | 32.0            |
| S103B      | 175        | 4416.4 | 1267.2 | 374.9 | 171.6 | 103.3            | 1489.3            | 1592.7              | 268.7 | 52.97 | 491.4 | 7750.9          | 707.6 | 28.0            |
| S104B      | 200        | 4496.1 | 1283.7 | 385.0 | 177.2 | 102.3            | 1490.3            | 1592.7              | 275.0 | 52.42 | 494.9 | 7864.5          | 635.2 | 25.4            |
| S105B      | 225        | 4501.1 | 1291.9 | 385.4 | 174.9 | 101.4            | 1496.2            | 1597.6              | 276.5 | 52.79 | 494.9 | 8091.7          | 640.6 | 21.4            |
| S106B      | 250        | 4494.1 | 1294.9 | 390.6 | 180.8 | 107.2            | 1477.6            | 1584.8              | 278.3 | 51.69 | 494.9 | 8994.9          | 646.0 | 16.1            |
| S107B      | 275        | 4391.4 | 1296.0 | 392.8 | 178.5 | 97.5             | 1498.2            | 1595.6              | 279.8 | 52.97 | 502.0 | 8205.3          | 643.3 | 20.1            |
| S108B      | 300        | 4317.0 | 1304.3 | 398.0 | 184.2 | 100.4            | 1495.2            | 1595.6              | 283.5 | 52.79 | 505.6 | 8091.7          | 624.5 | 43.9            |
| S109B      | 325        | 4341.5 | 1306.4 | 400.6 | 179.8 | 99.4             | 1497.2            | 1596.6              | 285.7 | 52.42 | 505.6 | 7864.5          | 664.7 | 26.7            |
| S110B      | 350        | 4366.5 | 1314.4 | 397.6 | 183.4 | 119.0            | 1492.3            | 1611.3              | 280.2 | 52.79 | 502.0 | 8148.5          | 656.7 | 30.7            |
| S111B      | 375        | 4541.1 | 1306.1 | 396.3 | 177.2 | 661.1            | 1565.7            | 2226.8              | 275.7 | 51.69 | 494.9 | 9777.6          | 600.4 | 32.0            |
| S112B      | 400        | 4566.1 | 1464.7 | 390.6 | 179.0 | 1101.7           | 1639.2            | 2740.9              | 209.8 | 54.97 | 484.2 | 8546.2          | 509.3 | 25.4            |
| S113B      | 425        | 4568.1 | 1472.9 | 389.3 | 176.5 | 1272.1           | 1568.7            | 2840.8              | 204.6 | 54.97 | 484.2 | 8773.4          | 463.8 | 16.1            |
| S114B      | 450        | 4591.0 | 1518.2 | 385.8 | 179.8 | 1994.7           | 1327.8            | 3322.5              | 179.4 | 56.25 | 477.1 | 8659.8          | 455.7 | 21.4            |
| S115B      | 475        | 4566.1 | 1481.2 | 382.5 | 169.6 | 2065.2           | 1227.9            | 3293.1              | 172.7 | 56.79 | 466.4 | 8773.4          | 445.0 | 14.8            |
| S116B      | 500        | 4591.0 | 1522.3 | 388.4 | 170.4 | 1330.8           | 1351.0            | 2681.9              | 162.0 | 57.16 | 470.0 | 9000.6          | 404.8 | 13.4            |
| S117B      | 525        | 4616.0 | 1514.1 | 398.9 | 165.7 | 2658.6           | 740.3             | 3398.9              | 163.4 | 56.79 | 470.0 | 9171.0          | 404.8 | 15.1            |

Table S2. Trace and rare earth elements in lake water.

| Sample | Depth | Sr     | As   | Ba   | Ce   | Cr   | Co    | Cu   | Dy  | Gd  | La   | Li    | Nd   | Ni    | Pb   | Pr   | Rb   | Sm  | U   | V   | Zn    |
|--------|-------|--------|------|------|------|------|-------|------|-----|-----|------|-------|------|-------|------|------|------|-----|-----|-----|-------|
| ID     | (cm)  | (µg/L) |      |      |      |      |       |      |     |     |      |       |      |       |      |      |      |     |     |     |       |
| S105B  | 225   | 3520.0 | 12.9 | 41.8 | 15.2 | 1.6  | 38.2  | 1.8  | 1.8 | 2.0 | 7.0  | 82.3  | 2.0  | 143.0 | 3.1  | 1.2  | 57.7 | 1.8 | 1.0 | 0.8 | 719.2 |
| N88B   | 400   | 1710.4 | 5.1  | 29.5 | 30.9 | 6.3  | 41.4  | 12.7 | 1.9 | 2.3 | 14.7 | 79.6  | 12.1 | 94.9  | 6.3  | 3.0  | 50.9 | 2.1 | 1.6 | 2.1 | 459.7 |
| N90B   | 450   | 1385.6 | 2.3  | 42.8 | 12.6 | 4.6  | 23.2  | 5.8  | 1.5 | 1.5 | 6.4  | 52.0  | 4.6  | 65.7  | 5.4  | 1.1  | 41.0 | 1.5 | 1.3 | 1.2 | 591.0 |
| S117B  | 525   | 1824.6 | 11.4 | 31.2 | 53.5 | 15.3 | 101.7 | 21.4 | 6.5 | 8.0 | 52.4 | 131.0 | 42.9 | 341.8 | 25.7 | 11.1 | 75.4 | 7.1 | 1.7 | 4.1 | 827.6 |
| N94B   | 550   | 2343.7 | 9.6  | 28.6 | 54.6 | 13.1 | 89.7  | 23.7 | 5.3 | 6.5 | 54.7 | 104.7 | 35.4 | 286.7 | 77.4 | 9.4  | 78.8 | 5.7 | 1.8 | 3.5 | 893.6 |

**Table S3. Physical, chemical and isotopic data of pore waters.**

| Sample ID | Depth<br>(cm) | pH   | EC      | Eh   | TOC    | $\delta D$ | $\delta^{18}O$ | Ca       | Mg     | Na    | K     |
|-----------|---------------|------|---------|------|--------|------------|----------------|----------|--------|-------|-------|
|           |               |      | (mS/cm) | (mV) | (mg/L) | (‰)        |                | (μmol/L) |        |       |       |
| N1-131    | 0 ~ 2         | 2.91 | 2.55    | 133  | 15.86  | -44.243    | -4.614         | 3856.4   | 1043.7 | 315.4 | 163.5 |
| N1-132    | 0 ~ 5         | 3.13 | 2.58    | 120  | 28.49  | -44.599    | -4.670         | 3799.3   | 975.8  | 287.4 | 168.3 |
| N1-133    | 5 ~ 7         | 3.53 | 2.57    | 106  | 31.19  | -45.364    | -4.670         | 3803.9   | 962.7  | 307.3 | 196.3 |
| N1-134    | 7 ~ 10        | 3.73 | 2.54    | 73   | 26.22  | -45.859    | -4.783         | 3672.3   | 845.7  | 311.8 | 202.7 |
| N1-135    | 10 ~ 13       | 3.7  | 2.36    | 66   | 22.32  | -46.376    | -4.872         | 3629.0   | 718.4  | 318.5 | 176.4 |
| N1-136    | 13 ~ 17       | 4.31 | 2.14    | 55   | 22.37  | -47.052    | -5.044         | 3789.3   | 847.4  | 317.2 | 196.7 |
| N1-137    | 17 ~ 22       | 4.15 | 1.91    | 50   | 21.07  | -48.101    | -5.461         | 3585.3   | 708.4  | 314.7 | 189.4 |
| N2-138    | 0.0 ~ 2.0     | 3.1  | 2.21    | 97   | 25.78  | -46.934    | -5.628         | -        | -      | -     | -     |
| N2-139    | 2.0 ~ 4.5     | 2.97 | 2.20    | 87   | 28.64  | -50.419    | -5.645         | -        | -      | -     | -     |
| N2-140    | 4.5 ~ 7.0     | 2.92 | 1.96    | 87   | 29.65  | -52.395    | -6.058         | -        | -      | -     | -     |
| N2-141    | 7.0 ~ 9.5     | 3.45 | 1.82    | 59   | 22.84  | -54.773    | -6.686         | -        | -      | -     | -     |
| N2-142    | 9.5 ~ 15.0    | 3.63 | 1.78    | 58   | 23.85  | -55.268    | -7.002         | -        | -      | -     | -     |
| S1-150    | 0 ~ 2.0       | 2.71 | 2.08    | 115  | 27.16  | -45.240    | -5.513         | -        | -      | -     | -     |
| S1-151    | 2 ~ 4         | 2.83 | 2.01    | 113  | 34.13  | -46.380    | -5.610         | -        | -      | -     | -     |
| S1-152    | 4 ~ 6         | 3.24 | 1.97    | 108  | 35.85  | -47.183    | -5.837         | -        | -      | -     | -     |
| S1-153    | 6 ~ 9         | 3.58 | 1.90    | 101  | 37.13  | -48.567    | -6.023         | -        | -      | -     | -     |
| S1-154    | 9 ~ 12        | 3.65 | 1.79    | 91   | 38.12  | -48.773    | -6.116         | -        | -      | -     | -     |
| S1-155    | 12 ~ 14       | 4.12 | 1.78    | 53   | 33.75  | -49.443    | -6.221         | -        | -      | -     | -     |
| S1-156    | 14 ~ 17       | 4.08 | 2.04    | 56   | 32.85  | -48.256    | -6.214         | -        | -      | -     | -     |
| S1-157    | 17 ~ 19       | 3.56 | 2.15    | 79   | 29.47  | -48.256    | -5.986         | -        | -      | -     | -     |
| S1-158    | 19 ~ 22       | 3.47 | 2.11    | 73   | 31.52  | -47.878    | -6.248         | -        | -      | -     | -     |
| S1-159    | 22 ~ 25       | 3.92 | 1.91    | 60   | 31.85  | -49.852    | -6.478         | -        | -      | -     | -     |
| S1-160    | 25 ~ 28       | 4.21 | 1.83    | 52   | 27.35  | -51.354    | -6.608         | -        | -      | -     | -     |
| S2-168    | 0 ~ 2         | 2.98 | 2.30    | 132  | 19.5   | -50.992    | -6.867         | 4017.2   | 1139.7 | 308.4 | 159.1 |
| S2-169    | 2 ~ 4         | 3.11 | 2.16    | 117  | 22.75  | -52.447    | -7.102         | 3911.4   | 1029.6 | 307.5 | 152.9 |
| S2-170    | 4 ~ 6         | 3.35 | 2.03    | 105  | 20.58  | -53.996    | -7.215         | 3035.7   | 874.2  | 290.7 | 162.4 |
| S2-171    | 6 ~ 8         | 3.47 | 1.89    | 107  | 21.71  | -55.532    | -7.536         | 3019.1   | 884.6  | 292.3 | 165.2 |
| S2-172    | 8 ~ 11        | 3.66 | 1.73    | 102  | 22.47  | -56.911    | -7.807         | 2748.2   | 850.8  | 291.3 | 146.7 |
| S2-173    | 11 ~ 13       | 3.86 | 1.55    | 89   | 26.32  | -58.101    | -7.922         | 2495.1   | 724.1  | 294.0 | 141.7 |
| S2-174    | 13 ~ 16       | 4.26 | 1.38    | 57   | 20.75  | -59.988    | -8.139         | 2238.9   | 702.7  | 305.7 | 155.1 |
| S2-175    | 16 ~ 19       | 4.41 | 1.26    | 44   | 18.54  | -60.609    | -8.146         | 2078.4   | 674.8  | 315.4 | 160.1 |
| S2-176    | 19 ~ 22       | 4.23 | 1.09    | 43   | 18.36  | -58.478    | -8.293         | 2148.3   | 674.8  | 345.8 | 205.9 |
| S2-177    | 22 ~ 25       | 4.03 | 1.09    | 42   | 19.54  | -60.698    | -8.247         | 2087.3   | 659.9  | 352.8 | 208.1 |

**Table S3. (continued... Physical, chemical and isotopic data of pore waters)**

| Sample ID | Depth<br>(cm) | Fe <sup>II</sup> | Fe <sup>III</sup> | Fe <sub>Total</sub> | Al    | Mn   | Si    | SO <sub>4</sub> | Cl     | NO <sub>3</sub> |
|-----------|---------------|------------------|-------------------|---------------------|-------|------|-------|-----------------|--------|-----------------|
|           |               | (μmol/L)         |                   |                     |       |      |       |                 |        |                 |
| N1-131    | 0 ~ 2         | 6389.3           | 2620.3            | 9009.6              | 120.6 | 52.3 | 501.6 | 13570.3         | 1147.0 | 51.8            |
| N1-132    | 0 ~ 5         | 8592.5           | 2684.9            | 11277.4             | 108.7 | 48.6 | 486.4 | 15388.1         | 986.3  | 71.7            |
| N1-133    | 5 ~ 7         | 10889.7          | 2173.8            | 13063.5             | 80.1  | 31.8 | 491.7 | 14820.1         | 1236.3 | 55.8            |
| N1-134    | 7 ~ 10        | 11406.2          | 2167.9            | 13574.1             | 59.2  | 28.9 | 496.3 | 16637.9         | 1193.5 | 62.4            |
| N1-135    | 10 ~ 13       | 9673.5           | 2138.5            | 11812.1             | 24.7  | 22.6 | 520.4 | 15047.3         | 1189.9 | 47.7            |
| N1-136    | 13 ~ 17       | 9103.6           | 1733.2            | 10836.8             | 16.6  | 25.1 | 537.9 | 13911.2         | 1097.0 | 78.3            |
| N1-137    | 17 ~ 22       | 8193.0           | 1509.9            | 9702.9              | 10.3  | 20.4 | 617.7 | 12207.0         | 1086.3 | 16.1            |
| N2-138    | 0.0 ~ 2.0     | 5889.1           | 2306.0            | 8195.1              | -     | -    | -     | 12802.8         | 954.1  | 22.1            |
| N2-139    | 2.0 ~ 4.5     | 6282.4           | 2078.3            | 8360.7              | -     | -    | -     | 11053.2         | 800.5  | 43.9            |
| N2-140    | 4.5 ~ 7.0     | 5652.5           | 1652.4            | 7304.9              | -     | -    | -     | 10153.6         | 657.7  | 28.1            |
| N2-141    | 7.0 ~ 9.5     | 4307.4           | 1380.7            | 5688.0              | -     | -    | -     | 9078.8          | 539.8  | 34.6            |
| N2-142    | 9.5 ~ 15.0    | 5927.1           | 1153.0            | 7080.1              | -     | -    | -     | 9178.6          | 600.5  | 55.8            |
| S1-150    | 0 ~ 2.0       | 3330.6           | 2151.8            | 5482.4              | -     | -    | -     | 10389.2         | 850.6  | 37.3            |
| S1-151    | 2 ~ 4         | 3903.4           | 2056.3            | 5959.7              | -     | -    | -     | 10616.4         | 907.7  | 18.7            |
| S1-152    | 4 ~ 6         | 4542.4           | 2115.0            | 6657.4              | -     | -    | -     | 10275.6         | 1175.6 | 20.1            |
| S1-153    | 6 ~ 9         | 5196.0           | 2129.7            | 7325.7              | -     | -    | -     | 10161.9         | 1254.2 | 32.0            |
| S1-154    | 9 ~ 12        | 5717.4           | 1711.1            | 7428.5              | -     | -    | -     | 9821.1          | 1247.0 | 39.9            |
| S1-155    | 12 ~ 14       | 5475.0           | 1916.8            | 7391.8              | -     | -    | -     | 9480.3          | 895.4  | 14.8            |
| S1-156    | 14 ~ 17       | 6973.2           | 1887.4            | 8860.6              | -     | -    | -     | 11184.5         | 815.0  | 21.4            |
| S1-157    | 17 ~ 19       | 8177.6           | 1828.6            | 10006.2             | -     | -    | -     | 12502.3         | 809.7  | 29.3            |
| S1-158    | 19 ~ 22       | 7399.1           | 1608.3            | 9007.5              | -     | -    | -     | 11638.9         | 782.9  | 14.8            |
| S1-159    | 22 ~ 25       | 7098.0           | 1556.9            | 8655.0              | -     | -    | -     | 10275.6         | 762.1  | 22.7            |
| S1-160    | 25 ~ 28       | 6114.0           | 1204.4            | 7318.4              | -     | -    | -     | 9253.0          | 762.1  | 17.4            |
| S2-168    | 0 ~ 2         | 4894.9           | 1799.3            | 6694.1              | 133.4 | 45.3 | 441.5 | 9709.5          | 720.6  | 45.2            |
| S2-169    | 2 ~ 4         | 6253.5           | 1821.3            | 8074.8              | 98.5  | 40.1 | 481.6 | 9815.7          | 626.3  | 47.9            |
| S2-170    | 4 ~ 6         | 6532.6           | 1703.8            | 8236.4              | 54.4  | 33.4 | 572.9 | 9603.3          | 754.9  | 43.9            |
| S2-171    | 6 ~ 8         | 6062.6           | 1696.4            | 7759.0              | 32.9  | 34.4 | 583.9 | 9072.4          | 750.6  | 33.3            |
| S2-172    | 8 ~ 11        | 5915.7           | 1417.4            | 7333.1              | 31.8  | 29.8 | 590.8 | 8685.0          | 763.5  | 38.6            |
| S2-173    | 11 ~ 13       | 5225.4           | 1292.5            | 6517.9              | 13.3  | 26.4 | 733.5 | 7776.1          | 836.4  | 35.9            |
| S2-174    | 13 ~ 16       | 4329.4           | 1131.0            | 5460.4              | 7.7   | 25.2 | 724.3 | 6412.7          | 836.4  | 26.7            |
| S2-175    | 16 ~ 19       | 2559.5           | 756.4             | 3315.9              | 6.4   | 21.7 | 630.2 | 6980.8          | 909.2  | 28.0            |
| S2-176    | 19 ~ 22       | 2118.9           | 668.3             | 2787.2              | 6.1   | 18.7 | 502.0 | 4708.6          | 922.1  | 37.3            |
| S2-177    | 22 ~ 25       | 1839.8           | 572.8             | 2412.6              | 5.2   | 19.5 | 448.3 | 4822.2          | 866.4  | 33.3            |

**Table S4. Groundwater physical, chemical and isotopic data from the north and south sampling locations of the Lake 77.**

| ID  | Sampling<br>depth<br>(m) | Water<br>table<br>(m) | Temp. | pH   | EC      | Eh   | TOC    | DIC      | δD     | δ <sup>18</sup> O |
|-----|--------------------------|-----------------------|-------|------|---------|------|--------|----------|--------|-------------------|
|     |                          |                       | (°C)  |      | (mS/cm) | (mV) | (mg/L) | (μmol/L) | (‰)    | (‰)               |
| SP1 | 3                        | 2.115                 | 16.1  | 3.14 | 0.98    | 335  | 19.22  | 3044.1   | -      | -                 |
| SP2 | 2                        | 0.985                 | 17.5  | 3.25 | 1.13    | 322  | 18.34  | 1251.5   | 59.993 | 7.707             |
| SP3 | 3                        | 1.79                  | 15.2  | 2.97 | 1.22    | 331  | 16.98  | 1889.9   | -      | -                 |
| NP1 | 4                        | 0.87                  | 18.6  | 3.89 | 1.28    | 272  | 16.44  | 2265.7   | 60.910 | 7.866             |
| NP2 | 4                        | 1.445                 | 17.6  | 4.24 | 1.42    | 235  | 17.7   | 2365.9   | 61.633 | 8.023             |
| NP3 | 6                        | 4.5                   | 17.3  | 4.8  | 1.61    | 247  | 10.28  | 2200.0   | -      | -                 |
| NGW | 17.5                     | 5.6                   | 14.2  | 5.61 | 3.96    | 168  | 11.92  | 5175.9   | 62.430 | 8.090             |
|     |                          |                       |       |      |         |      |        |          | 64.685 | 8.358             |
|     |                          |                       |       |      |         |      |        |          | -      | -                 |
|     |                          |                       |       |      |         |      |        |          | 64.918 | 8.582             |
|     |                          |                       |       |      |         |      |        |          | -      | -                 |
|     |                          |                       |       |      |         |      |        |          | 65.469 | 8.529             |

**Table S4. (continued... Groundwater physical, chemical and isotopic data from the north and south sampling locations of the Lake 77)**

| ID  | Sampling<br>depth<br>(m) | Ca       | Mg     | Na    | K      | Fe <sup>II</sup> | Fe <sup>III</sup> | Fe <sub>Total</sub> | Al     | Mn   | Si     | SO <sub>4</sub> | Cl     | NO <sub>3</sub> |
|-----|--------------------------|----------|--------|-------|--------|------------------|-------------------|---------------------|--------|------|--------|-----------------|--------|-----------------|
|     |                          | (μmol/L) |        |       |        |                  |                   |                     |        |      |        |                 |        |                 |
| SP1 | 3                        | 2882.4   | 972.7  | 511.3 | 1063.2 | 155.8            | 581.6             | 737.5               | 824.6  | 28.7 | 739.4  | 2436.3          | 1393.5 | 17.4            |
| SP2 | 2                        | 2545.0   | 950.4  | 491.5 | 977.0  | 508.3            | 1004.6            | 1513.0              | 719.0  | 29.1 | 786.9  | 4708.6          | 1193.5 | 26.7            |
| SP3 | 3                        | 2944.3   | 1036.8 | 413.2 | 1133.1 | 484.8            | 1016.4            | 1501.2              | 1315.7 | 31.1 | 1075.3 | 5617.5          | 986.3  | 8.1             |
| NP1 | 4                        | 2844.5   | 1012.1 | 405.4 | 171.6  | 1865.5           | 1809.5            | 3675.0              | 1071.1 | 32.6 | 616.0  | 6867.2          | 461.2  | 49.2            |
| NP2 | 4                        | 1257.5   | 691.2  | 209.7 | 235.6  | 3175.6           | 2444.1            | 5619.7              | 3891.5 | 35.1 | 1253.3 | 10616.4         | 357.6  | 46.5            |
| NP3 | 6                        | 1362.3   | 758.9  | 315.6 | 240.1  | 5055.7           | 3190.2            | 8245.9              | 4245.4 | 42.3 | 1015.6 | 13229.5         | 607.7  | 54.5            |
| NGW | 17.5                     | 3654.0   | 1257.3 | 578.4 | 160.4  | 13545.2          | 2279.5            | 15824.8             | 19.6   | 0.6  | 5.4    | 27203.8         | 861.3  | 112.7           |

**Table S5. Physicochemical data of sediment cores and a soil sample from north and south sampling locations.**

| Sample ID | Depth<br>(cm) | AVS      | CRS    | TRIS   | Clay | Silt | Sand |
|-----------|---------------|----------|--------|--------|------|------|------|
|           |               | (μmol/L) |        |        | (%)  |      |      |
| N1-131    | 0 ~ 2         | 0.32     | 9.99   | 10.30  | 9.8  | 63.3 | 26.8 |
| N1-132    | 0 ~ 5         | 0.26     | 10.27  | 10.53  | 11.0 | 47.1 | 41.9 |
| N1-133    | 5 ~ 7         | 0.27     | 13.17  | 13.44  | 16.9 | 65.7 | 17.5 |
| N1-134    | 7 ~ 10        | 0.32     | 25.60  | 25.92  | 15.9 | 67.0 | 17.1 |
| N1-135    | 10 ~ 13       | 0.38     | 47.59  | 47.97  | 17.6 | 37.6 | 44.9 |
| N1-136    | 13 ~ 17       | 0.69     | 160.93 | 161.62 | 7.5  | 18.7 | 73.8 |
| N1-137    | 17 ~ 22       | 15.79    | 182.15 | 197.94 | 5.6  | 9.1  | 85.4 |
| N2-138    | 0.0 ~ 2.0     | -        | -      | -      | 23.2 | 72.5 | 4.3  |
| N2-139    | 2.0 ~ 4.5     | -        | -      | -      | 18.6 | 68.1 | 13.2 |
| N2-140    | 4.5 ~ 7.0     | -        | -      | -      | 22.1 | 72.7 | 5.2  |
| N2-141    | 7.0 ~ 9.5     | -        | -      | -      | 11.7 | 40.4 | 47.9 |
| N2-142    | 9.5 ~ 15.0    | -        | -      | -      | 12.7 | 31.5 | 55.8 |
| S1-150    | 0 ~ 2.0       | -        | -      | -      | 18.2 | 74.0 | 7.8  |
| S1-151    | 2 ~ 4         | -        | -      | -      | 20.0 | 74.6 | 5.4  |
| S1-152    | 4 ~ 6         | -        | -      | -      | 19.0 | 73.9 | 7.1  |
| S1-153    | 6 ~ 9         | -        | -      | -      | 15.1 | 73.8 | 11.1 |
| S1-154    | 9 ~ 12        | -        | -      | -      | 11.6 | 73.8 | 14.6 |
| S1-155    | 12 ~ 14       | -        | -      | -      | 22.3 | 73.7 | 4.0  |
| S1-156    | 14 ~ 17       | -        | -      | -      | 17.5 | 70.0 | 12.5 |
| S1-157    | 17 ~ 19       | -        | -      | -      | 20.8 | 72.9 | 6.3  |
| S1-158    | 19 ~ 22       | -        | -      | -      | 14.5 | 78.2 | 7.3  |
| S1-159    | 22 ~ 25       | -        | -      | -      | 15.2 | 78.0 | 6.8  |
| S1-160    | 25 ~ 28       | -        | -      | -      | 20.1 | 74.3 | 5.5  |
| S2-168    | 0 ~ 2         | 0.35     | 10.74  | 11.09  | 13.4 | 67.8 | 18.8 |
| S2-169    | 2 ~ 4         | 0.28     | 11.04  | 11.32  | 23.0 | 73.7 | 3.3  |
| S2-170    | 4 ~ 6         | 0.30     | 14.16  | 14.46  | 15.5 | 57.9 | 26.6 |
| S2-171    | 6 ~ 8         | 0.35     | 27.53  | 27.88  | 22.0 | 73.5 | 4.5  |
| S2-172    | 8 ~ 11        | 0.30     | 51.17  | 51.47  | 24.0 | 70.5 | 5.5  |
| S2-173    | 11 ~ 13       | 0.67     | 103.04 | 103.71 | 21.2 | 72.2 | 6.6  |
| S2-174    | 13 ~ 16       | 11.54    | 215.86 | 227.40 | 25.6 | 69.6 | 4.9  |
| S2-175    | 16 ~ 19       | 13.23    | 215.86 | 229.09 | 18.5 | 69.3 | 12.3 |
| S2-176    | 19 ~ 22       | 13.71    | 228.86 | 242.57 | 25.1 | 63.3 | 11.6 |
| S2-177    | 22 ~ 25       | 18.44    | 236.86 | 255.30 | 14.5 | 62.5 | 23.0 |
| Soil      | 0 ~ 5         | -        | -      | -      | 2.7  | 10.5 | 86.8 |
